# Supplementary material for: Beyond the MHC: A canine model of dermatomyositis shows a complex pattern of genetic risk involving novel loci
Source: PubMed Central journal article supplement (PMC5315411; doi:10.1371/journal.pgen.1006604), 2017-02-03
Supplement: pgen.1006604.s007.pdf [file pgen.1006604.s007.pdf]

**S1 Table. SNPs exceeding Bonferroni significance (5.08X10-7).**

| COLLIE GWAS |           |                       | SHETLAND SHEEPDOG GWAS |           |                       | COMBINED GWAS |           |                        |
|-------------|-----------|-----------------------|------------------------|-----------|-----------------------|---------------|-----------|------------------------|
| CHR         | BASE PAIR | P-VALUE               | CHR                    | BASE PAIR | P-VALUE               | CHR           | BASE PAIR | P-VALUE                |
| 10          | 2163303   | 1.47X10 <sup>-8</sup> | 31                     | 24107856  | 1.83X10 <sup>-9</sup> | 10            | 125292    | 2.30X10 <sup>-12</sup> |
| 10          | 2125046   | 4.24X10 <sup>-8</sup> | 31                     | 24225299  | 5.19X10 <sup>-9</sup> | 10            | 319019    | 2.30X10 <sup>-12</sup> |
| 10          | 2170946   | 4.24X10 <sup>-8</sup> | 31                     | 24164129  | 2.52X10 <sup>-8</sup> | 10            | 355241    | 2.30X10 <sup>-12</sup> |
| 10          | 2453907   | 4.24X10 <sup>-8</sup> | 31                     | 23978661  | 2.63X10 <sup>-8</sup> | 10            | 368251    | 2.30X10 <sup>-12</sup> |
| 10          | 3757306   | 4.24X10 <sup>-8</sup> | 31                     | 24026411  | 8.63X10 <sup>-8</sup> | 10            | 100589    | 2.77X10 <sup>-12</sup> |
| 10          | 4413901   | 4.24X10 <sup>-8</sup> | 31                     | 24577081  | 2.01X10 <sup>-7</sup> | 10            | 157505    | 1.25X10 <sup>-11</sup> |
| 10          | 4460808   | 4.24X10 <sup>-8</sup> | 31                     | 24581581  | 2.01X10 <sup>-7</sup> | 10            | 359293    | 1.27X10 <sup>-11</sup> |
| 10          | 4482172   | 4.24X10 <sup>-8</sup> | 31                     | 24584079  | 2.01X10 <sup>-7</sup> | 31            | 24164129  | 3.95X10 <sup>-8</sup>  |
| 10          | 1333693   | 2.20X10 <sup>-7</sup> | 31                     | 23847695  | 2.20X10 <sup>-7</sup> | 31            | 24026411  | 4.41X10 <sup>-8</sup>  |
| 10          | 125292    | 2.71X10 <sup>-7</sup> | 10                     | 1720538   | 2.56X10 <sup>-7</sup> |               |           |                        |
| 10          | 319019    | 2.71X10 <sup>-7</sup> | 31                     | 22033805  | 3.33X10 <sup>-7</sup> |               |           |                        |
| 10          | 355241    | 2.71X10 <sup>-7</sup> | 31                     | 23925418  | 3.88X10 <sup>-7</sup> |               |           |                        |
| 10          | 368251    | 2.71X10 <sup>-7</sup> |                        |           |                       |               |           |                        |
| 10          | 2908436   | 2.71X10 <sup>-7</sup> |                        |           |                       |               |           |                        |
| 10          | 4038486   | 2.71X10 <sup>-7</sup> |                        |           |                       |               |           |                        |
| 10          | 4054430   | 2.71X10 <sup>-7</sup> |                        |           |                       |               |           |                        |
| 10          | 4047342   | 3.21X10 <sup>-7</sup> |                        |           |                       |               |           |                        |
