# Supplementary material for: Beyond the MHC: A canine model of dermatomyositis shows a complex pattern of genetic risk involving novel loci
Source: PubMed Central journal article supplement (PMC5315411; doi:10.1371/journal.pgen.1006604), 2017-02-03
Supplement: pgen.1006604.s008.pdf [file pgen.1006604.s008.pdf]

**S2 Table. Chromosome 10 variants segregating with the lead SNPs in the affected dogs.**

| Position | Reference            | Alternate    |
|----------|----------------------|--------------|
| 983      | C                    | T            |
| 1455     | C                    | G            |
| 4302     | A                    | G            |
| 4668     | T                    | C            |
| 4860     | A                    | G            |
| 4940     | GATTCTTTTCAATTCGATTC | -            |
| 5145     | C                    | T            |
| 5194     | A                    | G            |
| 19674    | A                    | G            |
| 19704    | G                    | C            |
| 19913    | C                    | T            |
| 20162    | G                    | T            |
| 20220    | T                    | G            |
| 20727    | A                    | C            |
| 21565    | T                    | A            |
| 24602    | G                    | A            |
| 25645    | G                    | A            |
| 25646    | T                    | A            |
| 25650    | G                    | A            |
| 28481    | G                    | A            |
| 29441    | C                    | T            |
| 29593    | C                    | T            |
| 29747    | A                    | G            |
| 30885    | G                    | A            |
| 31306    | G                    | A            |
| 31669    | -                    | G            |
| 31689    | A                    | C            |
| 31838    | T                    | G            |
| 32200    | G                    | C            |
| 33320    | A                    | G            |
| 33783    | -                    | TGTGTGTG     |
| 34721    | G                    | A            |
| 35524    | AAATAAAT             | -,AAAT       |
| 35632    | -                    | GATT         |
| 35919    | A                    | G            |
| 35948    | A                    | T            |
| 36416    | G                    | A            |
| 36580    | T                    | C            |
| 38490    | A                    | G            |
| 38994    | G                    | A            |
| 39186    | T                    | G            |
| 39583    | T                    | G            |
| 40824    | -                    | G            |
| 41681    | A                    | G            |
| 42722    | -                    | TTTCTTTCTTTC |
| 46324    | G                    | A            |
| 46566    | -                    | ACAT         |
| 47636    | T                    | C            |
| 48860    | G                    | A            |
| 51938    | G                    | A            |
| 52373    | A                    | T            |
| 53042    | A                    | G            |
| 53231    | A                    | T            |

|       |                                        |              |
|-------|----------------------------------------|--------------|
| 53630 | A                                      | G            |
| 53669 | A                                      | T            |
| 54586 | T                                      | A            |
| 55154 | C                                      | G            |
| 55497 | C                                      | G            |
| 58074 | A                                      | G            |
| 58163 | A                                      | C            |
| 58193 | C                                      | T            |
| 58464 | A                                      | G            |
| 58750 | C                                      | G            |
| 58838 | -                                      | CC           |
| 61325 | A                                      | C            |
| 61350 | C                                      | G            |
| 62250 | -                                      | AAAT         |
| 62307 | G                                      | T            |
| 62348 | C                                      | A            |
| 62513 | C                                      | T            |
| 62583 | A                                      | G            |
| 65849 | TTATTATATCCATTTCTTTTTTTTTTTTTTTTTTATTA | -            |
| 67255 | T                                      | C            |
| 69315 | G                                      | T            |
| 70504 | A                                      | G            |
| 71227 | -                                      | A            |
| 71367 | A                                      | -            |
| 71494 | G                                      | A            |
| 72187 | C                                      | G            |
| 72799 | T                                      | G            |
| 73717 | C                                      | T            |
| 74999 | G                                      | A            |
| 75146 | C                                      | T            |
| 76869 | A                                      | C            |
| 77666 | C                                      | T            |
| 77841 | C                                      | T            |
| 77870 | -                                      | A            |
| 80439 | -                                      | GA           |
| 80594 | T                                      | A            |
| 81349 | C                                      | T            |
| 81424 | T                                      | G            |
| 82860 | T                                      | C            |
| 83789 | T                                      | C,G          |
| 84785 | -                                      | AA,AAATAA    |
| 84996 | A                                      | G            |
| 85168 | A                                      | -            |
| 86938 | T                                      | G            |
| 87675 | CTCTCTCT                               | -,CTCTCTCTCT |
| 87983 | T                                      | C            |
| 89056 | T                                      | G            |
| 89486 | C                                      | T            |
| 90648 | -                                      | A            |
| 91287 | T                                      | C            |
| 91288 | G                                      | C            |
| 92589 | T                                      | C            |
| 92627 | C                                      | T            |
| 95042 | T                                      | C            |
| 95875 | A                                      | G            |
| 95901 | C                                      | T            |

|        |       |            |
|--------|-------|------------|
| 96173  | -     | TGTGTG     |
| 96654  | -     | T          |
| 97689  | C     | T          |
| 97690  | C     | T          |
| 100589 | G     | A          |
| 103427 | T     | G          |
| 105473 | T     | C          |
| 106427 | GT    | -          |
| 106429 | -     | ACACACACAC |
| 108574 | C     | G          |
| 108782 | A     | G          |
| 109616 | A     | G          |
| 109776 | G     | C          |
| 114443 | T     | C          |
| 115789 | T     | C          |
| 115831 | T     | C          |
| 116599 | A     | G          |
| 117970 | T     | C          |
| 118024 | T     | C          |
| 119310 | A     | C          |
| 119614 | T     | C          |
| 121835 | G     | A          |
| 121966 | -     | G          |
| 122074 | A     | G          |
| 123135 | TTT   | -,T        |
| 123155 | -     | T          |
| 123784 | C     | T          |
| 124773 | G     | C          |
| 124785 | G     | T          |
| 125199 | T     | C          |
| 125292 | A     | G          |
| 125609 | C     | T          |
| 126124 | A     | T          |
| 126271 | T     | C          |
| 127268 | -     | C          |
| 127461 | T     | C          |
| 128048 | G     | A          |
| 130085 | -     | C          |
| 130214 | C     | A          |
| 130972 | C     | T          |
| 131270 | A     | G          |
| 132736 | G     | A          |
| 133034 | -     | CT         |
| 133275 | G     | A          |
| 133484 | C     | T          |
| 134896 | TAAAT | -          |
| 135031 | G     | T          |
| 136172 | A     | G          |
| 137970 | C     | A          |
| 138038 | T     | A          |
| 138609 | T     | C          |
| 138649 | G     | A          |
| 138764 | A     | G          |
| 141322 | -     | C          |
| 141332 | C     | A          |
| 143362 | -     | A          |

|        |                                                                                                 |      |
|--------|-------------------------------------------------------------------------------------------------|------|
| 144474 | T                                                                                               | A    |
| 144542 | T                                                                                               | G    |
| 146163 | G                                                                                               | -    |
| 147307 | TTTC                                                                                            | -    |
| 154392 | C                                                                                               | T    |
| 155755 | A                                                                                               | G    |
| 155779 | C                                                                                               | A    |
| 155975 | -                                                                                               | T    |
| 157505 | A                                                                                               | G    |
| 158846 | T                                                                                               | C    |
| 159056 | C                                                                                               | -    |
| 159624 | C                                                                                               | G    |
| 162915 | -                                                                                               | AAA  |
| 163496 | -                                                                                               | AA   |
| 163852 | G                                                                                               | A    |
| 163991 | C                                                                                               | T    |
| 164263 | T                                                                                               | -    |
| 164266 | -                                                                                               | ATCC |
| 164267 | TCC                                                                                             | -    |
| 164272 | C                                                                                               | T    |
| 164273 | C                                                                                               | T    |
| 164533 | A                                                                                               | T    |
| 164534 | A                                                                                               | C    |
| 164794 | T                                                                                               | C    |
| 165665 | C                                                                                               | A    |
| 165898 | C                                                                                               | T    |
| 167713 | A                                                                                               | -    |
| 168931 | -                                                                                               | TAAA |
| 168934 | G                                                                                               | A    |
| 171502 | T                                                                                               | G    |
| 171667 | G                                                                                               | T    |
| 171742 | C                                                                                               | T    |
| 172944 | T                                                                                               | C    |
| 173571 | -                                                                                               | AAC  |
| 174218 | A                                                                                               | G    |
| 174553 | -                                                                                               | A    |
| 175817 | C                                                                                               | T    |
| 177122 | A                                                                                               | G    |
| 178947 | A                                                                                               | C    |
| 182833 | G                                                                                               | T    |
| 183310 | CT                                                                                              | -    |
| 187227 | -                                                                                               | AA   |
| 188595 | A                                                                                               | -    |
| 189225 | -                                                                                               | CT   |
| 189269 | T                                                                                               | A    |
| 189284 | CC                                                                                              | -    |
| 189286 | A                                                                                               | T    |
| 189791 | T                                                                                               | A    |
| 190251 | T                                                                                               | C    |
| 190571 | TAAGAG                                                                                          | -    |
| 190578 | TTATATCAGGGGATCCCTGGGTGGCGCAGCGGT<br>TTGGTGCCTGCCTTTGGCCCAGGGCGCGATCC<br>TGGAGACCCGGGATCGAATCCC | -    |
| 191464 | T                                                                                               | C    |
| 191530 | -                                                                                               | TT   |
| 191590 | TT                                                                                              | -    |

|        |                                                         |                  |
|--------|---------------------------------------------------------|------------------|
| 192779 | -                                                       | CC,CCCC          |
| 192804 | C                                                       | T                |
| 192869 | A                                                       | -                |
| 193366 | AAAAGTTTCTAAATGCTAAAAAAAAAAAAAAAAA<br>AAAAAAAAAAAAAAAAA | -                |
| 194353 | C                                                       | A                |
| 196673 | -                                                       | GAGA             |
| 197178 | C                                                       | G                |
| 197187 | T                                                       | C                |
| 197579 | TT                                                      | -                |
| 198004 | CTTTTCTTTTCTTTTCTTT                                     | -                |
| 198064 | G                                                       | A                |
| 198073 | C                                                       | T                |
| 198367 | T                                                       | C                |
| 198717 | A                                                       | C                |
| 198929 | -                                                       | CTCTCTCTCTCTCTCT |
| 199840 | T                                                       | C                |
| 199868 | C                                                       | T                |
| 203558 | G                                                       | A                |
| 204436 | T                                                       | C                |
| 205671 | G                                                       | A                |
| 206024 | C                                                       | T                |
| 206156 | T                                                       | -                |
| 208223 | G                                                       | A                |
| 209994 | A                                                       | G                |
| 210826 | A                                                       | -                |
| 211260 | A                                                       | T                |
| 213933 | G                                                       | T                |
| 219112 | C                                                       | T                |
| 222809 | T                                                       | G                |
| 223827 | A                                                       | G                |
| 223963 | T                                                       | C                |
| 227962 | T                                                       | A                |
| 228189 | T                                                       | C                |
| 230921 | T                                                       | -                |
| 231747 | C                                                       | G                |
| 232975 | TAAAAATTT                                               | -                |
| 233908 | T                                                       | C                |
| 236429 | T                                                       | C                |
| 236812 | -                                                       | A                |
| 238792 | AAG                                                     | -                |
| 238925 | A                                                       | T                |
| 238934 | C                                                       | T                |
| 239258 | C                                                       | T                |
| 239760 | G                                                       | A                |
| 240699 | T                                                       | A                |
| 240737 | -                                                       | CAGAGAGG         |
| 242049 | G                                                       | A                |
| 244444 | CTCT                                                    | -                |
| 245248 | A                                                       | -                |
| 248834 | G                                                       | T                |
| 249441 | AAATAA                                                  | -                |
| 249645 | G                                                       | C                |
| 251126 | TG                                                      | -                |
| 251348 | -                                                       | AAAT,AAATAAAT    |
| 251368 | -                                                       | AATA             |

|        |      |                        |
|--------|------|------------------------|
| 255125 | A    | C                      |
| 255884 | T    | C                      |
| 256328 | G    | C                      |
| 256801 | -    | A                      |
| 258954 | -    | A                      |
| 258968 | A    | G                      |
| 260700 | -    | TCTCTC                 |
| 260805 | G    | A                      |
| 263272 | A    | C                      |
| 264609 | A    | -                      |
| 264826 | T    | C                      |
| 264891 | CTCT | -                      |
| 264966 | -    | A,AA                   |
| 265620 | -    | ACATATGCT              |
| 265976 | C    | T                      |
| 267300 | -    | GGCTAC                 |
| 268234 | G    | C                      |
| 272766 | -    | T                      |
| 273866 | A    | -                      |
| 277244 | G    | A                      |
| 277609 | T    | C                      |
| 279483 | T    | C                      |
| 279819 | -    | T                      |
| 283554 | G    | T,GT                   |
| 284398 | CT   | -                      |
| 288586 | G    | A                      |
| 289277 | C    | A                      |
| 289502 | C    | T                      |
| 290259 | C    | T                      |
| 292084 | G    | T                      |
| 293323 | T    | G                      |
| 293324 | C    | A                      |
| 294584 | A    | G                      |
| 297298 | -    | TTTTGT                 |
| 297302 | -    | G                      |
| 297305 | -    | TG                     |
| 302341 | -    | ACACAC,ACACACACAC      |
| 304059 | -    | ATTT,ATTTATTT          |
| 309651 | G    | C                      |
| 310721 | G    | C                      |
| 313460 | T    | G                      |
| 314549 | A    | -                      |
| 315259 | T    | G                      |
| 315772 | G    | A                      |
| 316103 | C    | G                      |
| 316273 | C    | G                      |
| 317274 | TTTA | -,TTTATTTATTTATTTATTTA |
| 317694 | T    | C                      |
| 319019 | G    | A                      |
| 319508 | A    | G                      |
| 319770 | CC   | -                      |
| 319770 | C    | G                      |
| 319771 | C    | A                      |
| 321002 | C    | T                      |
| 326105 | G    | A                      |
| 327065 | T    | C                      |

|        |     |                                 |
|--------|-----|---------------------------------|
| 328251 | T   | G                               |
| 328758 | T   | C                               |
| 331135 | A   | G                               |
| 331768 | C   | T                               |
| 334964 | -   | TCTC                            |
| 335222 | -   | A                               |
| 337919 | T   | -                               |
| 338118 | -   | T                               |
| 338323 | -   | T                               |
| 339097 | C   | T                               |
| 342843 | G   | A                               |
| 344853 | A   | G                               |
| 344919 | C   | G                               |
| 345210 | -   | CA                              |
| 345919 | A   | G                               |
| 346090 | C   | G                               |
| 350369 | -   | AAAATAAAAT,AAAATAAAATAAAATAAAAT |
| 351679 | -   | A                               |
| 352840 | A   | G                               |
| 355241 | T   | G                               |
| 355949 | G   | T                               |
| 355953 | G   | T                               |
| 355969 | T   | G                               |
| 355973 | T   | G                               |
| 356507 | C   | A                               |
| 358754 | A   | G                               |
| 359293 | A   | G                               |
| 363034 | T   | C                               |
| 366583 | A   | G                               |
| 368251 | T   | C                               |
| 369609 | T   | C                               |
| 370205 | A   | T                               |
| 370561 | -   | AGAG,AGAGAGAGAG                 |
| 370976 | -   | AA                              |
| 371592 | G   | A                               |
| 371755 | C   | T                               |
| 372114 | AA  | -                               |
| 376253 | A   | -                               |
| 376823 | -   | T                               |
| 376826 | T   | C                               |
| 378943 | G   | T                               |
| 380460 | -   | TATTC                           |
| 381048 | -   | CT                              |
| 382635 | A   | C                               |
| 383033 | -   | T                               |
| 384401 | G   | A                               |
| 384806 | T   | C                               |
| 385406 | G   | C                               |
| 386021 | A   | T                               |
| 387325 | AAA | -                               |
| 388036 | -   | T                               |
| 388893 | A   | T                               |
| 390674 | TTA | -                               |
| 391084 | -   | A                               |
| 391262 | C   | T                               |
| 392287 | C   | G                               |

393819  
394188  
395522  
397303  
397443  
397839  
397865  
399997  
400111  
400234  
401025

A  
C  
AGTA  
C  
-  
T  
C  
AA  
T  
T  
-

-  
T  
-  
T  
A  
G  
T  
-  
C  
A  
AA

delTTTCTTTC,TTTCTTTCTTTCTTTCTTTCTTTCTTTCT  
TTC,TTTCTTTCTTTCTTTCTTTCTTTCTTTCTTTCTTTCT  
TTTC

401521

TTTCTTTCTTTCTTTC

401970  
403085  
403733  
407714  
407821  
408176  
408277  
409137  
410451  
411186  
411648  
425456  
426511  
435789  
446629  
450399  
463902  
464745  
468814  
473244  
479004  
480891  
527236  
529504  
531522  
539979  
541546  
545297  
553356  
559530  
565958  
569295  
572024  
584808  
592283  
592859  
592863  
596255  
600296  
603725  
606457  
607719

A  
-  
A  
GA  
T  
G  
C  
-  
G  
T  
A  
T  
T  
G  
G  
G  
T  
CA  
-  
GT  
G  
-  
A  
A  
G  
A  
G  
G  
C  
AGA  
G  
G  
G  
-  
A  
G  
T  
A  
ATTTTT  
-  
A  
-

C  
T  
T  
-  
G  
C  
T  
CA  
C  
-  
C  
A  
G  
A  
A  
A  
-  
TTTC  
-  
A  
-  
T  
A  
-  
T  
A  
-  
A  
-  
A  
-  
A  
C  
-  
A  
G  
ATTCTTTTTT

AAAAAAAAAAAAAAAAAAAAAAAAAAAAAAAAAAAAAAAA

-,AAA



|        |                    |                  |
|--------|--------------------|------------------|
| 614684 | G                  | C                |
| 621366 | G                  | A                |
| 627760 | G                  | A                |
| 628057 | T                  | C                |
| 644479 | C                  | T                |
| 679901 | A                  | -                |
| 681353 | T                  | A                |
| 684541 | AAAGAAAAAGAAAAAGAA | -                |
| 685467 | -                  | G                |
| 691560 | AG                 | -                |
| 705625 | ACAC               | -,ACACACAC       |
| 708173 | C                  | T                |
| 709584 | T                  | A                |
| 713468 | -                  | A                |
| 718727 | A                  | G                |
| 721159 | A                  | G                |
| 737228 | G                  | -                |
| 746264 | A                  | -                |
| 753324 | G                  | A                |
| 754312 | AG                 | -                |
| 754369 | C                  | T                |
| 754507 | -                  | ATTTATTT         |
| 759008 | A                  | T                |
| 766773 | C                  | T                |
| 770370 | TTTATTTA           | -                |
| 773874 | -                  | T                |
| 773944 | AC                 | -                |
| 774278 | G                  | A                |
| 774287 | -                  | TA               |
| 781273 | TAAATAAA           | -                |
| 791538 | ATTT               | -                |
| 792750 | T                  | -                |
| 795887 | T                  | C                |
| 800064 | G                  | -                |
| 800906 | TTGTT              | -                |
| 801063 | -                  | GA               |
| 808263 | A                  | G                |
| 810666 | C                  | T                |
| 811286 | -                  | T                |
| 812076 | CT                 | -,CTCTCT         |
| 812789 | T                  | C                |
| 816416 | A                  | T                |
| 834949 | G                  | A                |
| 835850 | T                  | C                |
| 838641 | A                  | -                |
| 850906 | CC                 | -,C              |
| 851959 | C                  | -                |
| 855683 | T                  | A                |
| 856040 | C                  | T                |
| 863353 | G                  | A                |
| 867832 | G                  | A                |
| 871478 | A                  | -                |
| 879196 | AATAAATAAATA       | -,AATA           |
| 883486 | C                  | T                |
| 888939 | T                  | -                |
| 890576 | -                  | AATGAATAAATAAATA |

|         |          |               |
|---------|----------|---------------|
| 891964  | A        | -             |
| 893954  | T        | G             |
| 896459  | -        | AA            |
| 906950  | -        | A             |
| 910309  | T        | -             |
| 910992  | T        | C             |
| 917310  | -        | T             |
| 917884  | T        | A             |
| 919616  | TTTTAT   | -             |
| 923362  | AAAT     | -             |
| 926622  | T        | -             |
| 927308  | A        | G             |
| 929039  | -        | TTAT          |
| 933041  | TT       | -             |
| 940501  | -        | A             |
| 940996  | A        | G             |
| 941544  | G        | A             |
| 949170  | A        | G             |
| 962343  | TATTTATT | -             |
| 964052  | G        | A             |
| 965072  | -        | TTTA          |
| 965128  | AGAG     | -             |
| 971007  | TGTTT    | -             |
| 971895  | T        | -             |
| 974559  | A        | T             |
| 975201  | T        | C             |
| 975203  | C        | T             |
| 975216  | C        | A             |
| 978940  | C        | T             |
| 993657  | T        | C             |
| 1010309 | -        | CT            |
| 1020038 | TTC      | -             |
| 1024911 | -        | T             |
| 1025010 | -        | AGAG          |
| 1031837 | C        | T             |
| 1042098 | TATG     | -             |
| 1051909 | T        | C             |
| 1061145 | C        | -             |
| 1074035 | T        | C             |
| 1090400 | -        | TTTA,TTTATTTA |
| 1096770 | G        | A             |
| 1096919 | A        | T,AT          |
| 1099689 | ATAA     | -             |
| 1108799 | C        | T             |
| 1111745 | -        | ATTT          |
| 1121749 | G        | A             |
| 1127082 | C        | T             |
| 1128658 | -        | T             |
| 1130331 | -        | AC            |
| 1131360 | C        | T             |
| 1131903 | -        | C             |
| 1135206 | A        | G             |
| 1150305 | T        | C             |
| 1164726 | C        | T             |
| 1165045 | -        | AG            |
| 1168367 | T        | C             |

|         |      |    |
|---------|------|----|
| 1175038 | T    | C  |
| 1182874 | TCTC | -  |
| 1195393 | -    | TC |
| 1207836 | -    | A  |
| 1217285 | -    | CA |
| 1222163 | T    | -  |
| 1228277 | G    | C  |
| 1239562 | G    | A  |
| 1259335 | T    | A  |
| 1272949 | G    | A  |
| 1286150 | C    | T  |
| 1290104 | C    | T  |
| 1291016 | C    | T  |
| 1296029 | G    | A  |
| 1299356 | C    | T  |
| 1315005 | C    | A  |
| 1319925 | G    | C  |
| 1322218 | G    | A  |
| 1325422 | G    | A  |
| 1333693 | G    | A  |
