# Supplementary material for: Beyond the MHC: A canine model of dermatomyositis shows a complex pattern of genetic risk involving novel loci
Source: PubMed Central journal article supplement (PMC5315411; doi:10.1371/journal.pgen.1006604), 2017-02-03
Supplement: pgen.1006604.s012.pdf [file pgen.1006604.s012.pdf]

**S6 Table. Primers and genotyping method for variants.**

| <b>Chr</b> | <b>Position</b> | <b>Gene</b>     | <b>Forward primer (5'-3')</b> | <b>Reverse primer (5'-3')</b> | <b>Genotyping method</b>           |
|------------|-----------------|-----------------|-------------------------------|-------------------------------|------------------------------------|
| 10         | 565958          | <i>ANKRD52</i>  | GGAGTCTGGGTAGTGAGCCT          | GATGCCTATGGACAGTGAGTG         | Restriction digest: <i>BamHI</i>   |
| 10         | 627760          | <i>PAN2</i>     | AAGAAGGACCAAGGCAGTAGG         | ACCGACTCAAGGAATCAGACAG        | Restriction digest: <i>Acil</i>    |
| 10         | 1239562         | <i>STAT6</i>    | CCTCTTCACCACCACTGCTC          | CGTAGTTCCTGCCTCTCACC          | Sanger sequencing                  |
| 31         | 24132273        | <i>MAP3K7CL</i> | TGGAGAGGCAAGGAAAGGA           | CAACCAAGAACATCTGTCGG          | Restriction digest: <i>Hpy188I</i> |
| 31         | 24132343        | <i>MAP3K7CL</i> | CTGGAATAGACACAGACACCGA        | CCTAAACCGCCTTGCCTT            | Sanger sequencing                  |
