# Supplementary material for: Beyond the MHC: A canine model of dermatomyositis shows a complex pattern of genetic risk involving novel loci
Source: PLOS journal article supplement (doi:10.1371/journal.pgen.1006604), 2017-02-03
Supplement: S2 (10.1371/journal.pgen.1006604.s002) [file journal.pgen.1006604.s002]

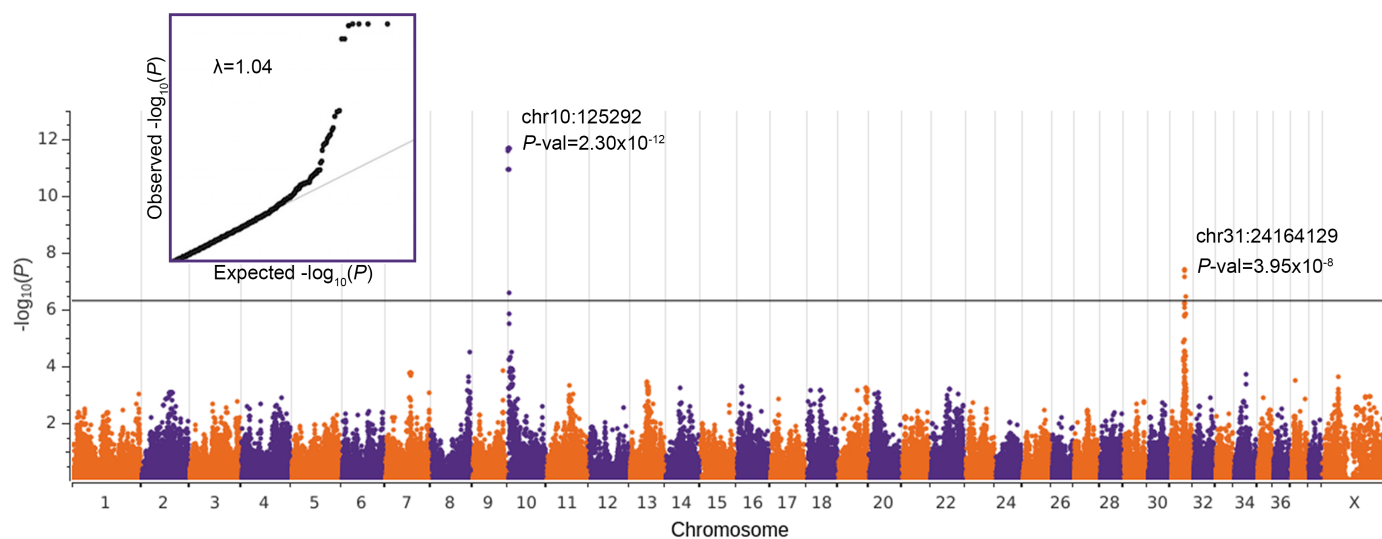

**S2 Fig. Manhattan and quantile-quantile plots of combined DMS GWAS (97 cases vs. 68 controls).** The  $-\log_{10}P$ -values (y-axis) for 98,520 Illumina SNPs are plotted against chromosome position (x-axis). The threshold for Bonferroni significance is shown as a black horizontal line. The  $P$ -value and position (canFam3) of the lead SNPs are reported. The Q-Q plot is boxed in purple and plots observed vs. expected Fisher's exact  $-\log_{10}P$ -values. The inflation factor ( $\lambda$ ) is shown on the Q-Q plot.
