# Supplementary material for: Beyond the MHC: A canine model of dermatomyositis shows a complex pattern of genetic risk involving novel loci
Source: PLOS journal article supplement (doi:10.1371/journal.pgen.1006604), 2017-02-03
Supplement: S3 (10.1371/journal.pgen.1006604.s003) [file journal.pgen.1006604.s003]

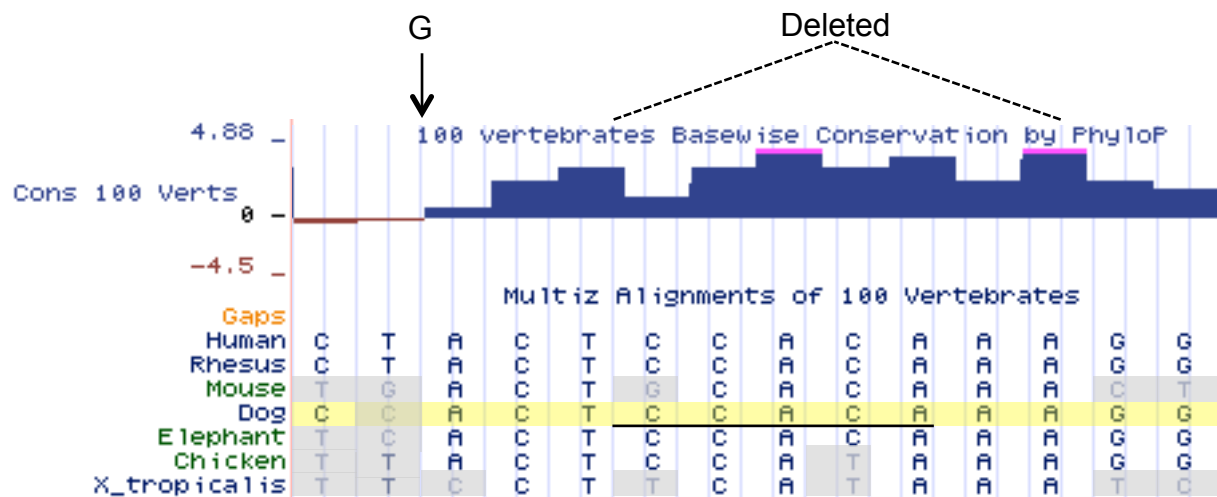

**S3 Fig. *MAP3K7CL* indel with conservation and RUNX3 binding motif.** UCSC 100 Vertebrates track for human chr21:29,130,846-29,130,860 showing the G insertion and seven base pair deletion created by *MAP3K7CL* indel (Dog c.383\_392ACTCCACAAA>GACT). Bases in gray differ from the dog reference sequence. The canine sequence is highlighted in yellow. The RUNX3 binding motif is underlined.
