# Supplementary material for: Beyond the MHC: A canine model of dermatomyositis shows a complex pattern of genetic risk involving novel loci
Source: PLOS journal article supplement (doi:10.1371/journal.pgen.1006604), 2017-02-03
Supplement: S6 (10.1371/journal.pgen.1006604.s006) [file journal.pgen.1006604.s006]

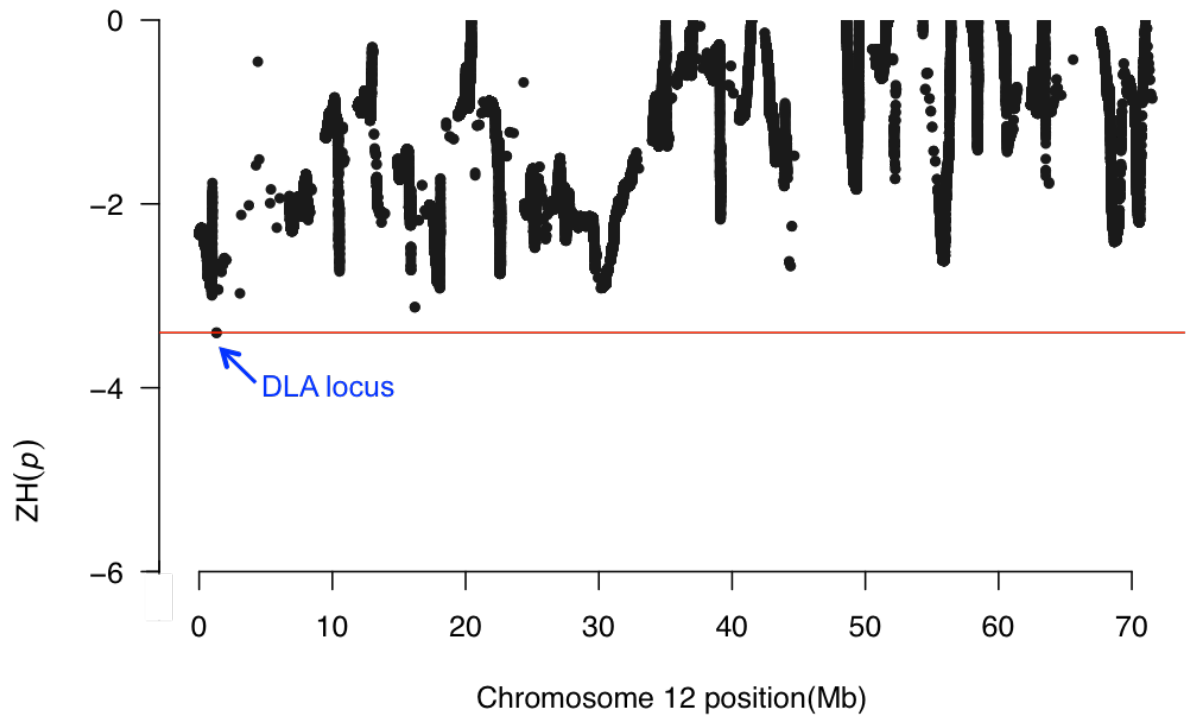

**S6 Fig. Collie selective sweeps on chromosome 12.**  $ZH(p)$  values for all creeping windows containing 50 or more SNPs are plotted against chromosome position. Creeping windows are  $\leq 1$  Mb.
